# Supplementary material
Source: publisher site journal article supplement (https://www.dovepress.com/get_supplementary_file.php?f=239158.docx)
Supplement: Supplementary file 1 [file get_supplementary_file.php]

**Table S1: The clinical characteristics of untreated MDS patients**

| **Number** | **Age** | **Gender** | **Diagnosis** | **WBC** | **HGB** | **PLT** |
| --- | --- | --- | --- | --- | --- | --- |
| A1 | 26 | M | MDS-RCMD | 3.24 | 117 | 29 |
| A2 | 54 | F | MDS-RCMD | 1.87 | 88 | 31 |
| A3 | 28 | F | MDS-RCMD | 2.92 | 67 | 8 |
| A4 | 25 | F | MDS-RCMD | 1.9 | 37 | 41 |
| A5 | 45 | F | MDS-RCMD | 3.29 | 117 | 40 |
| A6 | 43 | F | MDS-RAEB | 0.2 | 122 | 70 |
| A7 | 22 | M | MDS-RCMD | 3.7 | 51 | 14 |
| A8 | 31 | F | MDS-RCMD | 5.55 | 106 | 9 |
| A9 | 32 | F | MDS-RCMD | 1.69 | 37 | 12 |
| A10 | 30 | F | MDS-RCMD | 2.57 | 72 | 20 |

**Table S2: The clinical characteristics of healthy donors**

| **Number** | **Age** | **Gender** | **WBC** | **HGB** | **PLT** |
| --- | --- | --- | --- | --- | --- |
| N1 | 44 | F | 9.82 | 144 | 187 |
| N2 | 30 | F | 3.66 | 114 | 197 |
| N3 | 24 | M | 7.31 | 162 | 238 |

**Table S3. Primers used in this study**

| **Primer** | **Forward** | **Reverse** | **bp** |
| --- | --- | --- | --- |
| **Dnmt1** | CCTAGCCCCAGGATTACAAGG | ACTCATCCGATTTGGCTCTTTC | 118 |
| **Dnmt3b** | GACTTGGTGATTGGCGGAA | GGCCCTGTGAGCAGCAGA | 270 |
| **Dnmt3a** | TATTGATGAGCGCACAAGAGAGC | GGGTGTTCCAGGGTAACATTGAG | 111 |
| **IGF1** | TGCTGACCTCTGTTACCTCTCC | ACACATCGGCTTCTCCTCCAT | 139 |
| **FGF1** | AGAAGCCCAAACTCCTCTACTGT | GAATGTGCTGGTCGCTCCTG | 102 |
| **GAPDH** | CCTCTGACTTCAACAGCGACAC | TGGTCCAGGGGTCTTACTCC | 174 |

**Table S4. Number of differently methylated genes among 3 groups.**

| **Groups** | **Differential methylation**  **genes_num** | **Hypermethylated**  **genes_num** | **Hypomethylated**  **genes_num** |
| --- | --- | --- | --- |
| **Low VS Control** | 9 | 8 | 1 |
| **High VS Control** | 1032 | 975 | 57 |
| **High VS Low** | 970 | 890 | 80 |

**Table S5: The part of hypermethylated genes induced by AS2S2 in SKM-1 cells**

| **Gene Name** | **P-Value** | **Adjust Pvalue** | **beta-Difference** | **Mean_g3** | **Mean_g1** |
| --- | --- | --- | --- | --- | --- |
| **DLEU2L** | 0.000367276 | 0.021979145 | 0.215624394 | 0.712366339 | 0.496741945 |
| **FAM115C** | 0.000149766 | 0.020006911 | 0.151321764 | 0.22781834 | 0.076496575 |
| **FAM18B2** | 0.002549088 | 0.029649753 | 0.175100533 | 0.786382876 | 0.611282343 |
| **HSD3B2** | 0.001404982 | 0.025766555 | 0.142176919 | 0.766714586 | 0.624537667 |
| **KLF15** | 1.58343E-05 | 0.016324642 | 0.15821437 | 0.602153466 | 0.443939096 |
| **KRTAP5-10** | 3.99654E-05 | 0.01870256 | 0.140771459 | 0.609222077 | 0.468450619 |
| **LINC00273** | 1.66768E-05 | 0.016324642 | 0.14919141 | 0.778785293 | 0.629593883 |
| **LOC723972** | 8.77428E-05 | 0.019058074 | 0.227172606 | 0.764893934 | 0.537721327 |
| **MIR302C** | 0.000523684 | 0.022383499 | 0.166499739 | 0.895873982 | 0.729374243 |
| **MIR3198-2** | 1.56833E-05 | 0.016324642 | 0.460081727 | 0.524602626 | 0.064520898 |
| **PGLYRP4** | 0.00028004 | 0.021936823 | 0.172620345 | 0.831364996 | 0.658744651 |
| **SNX19** | 8.70145E-05 | 0.019058074 | 0.260006584 | 0.472900277 | 0.212893692 |
| **SPSB1** | 4.81308E-05 | 0.019058074 | 0.141481939 | 0.280660635 | 0.139178697 |
| **TRPC4** | 3.8485E-05 | 0.01870256 | 0.150738349 | 0.776437571 | 0.625699222 |
| **VHL** | 0.000858804 | 0.02379957 | 0.160661892 | 0.682613763 | 0.521951871 |
| **WNT9B** | 1.25156E-06 | 0.013186446 | 0.435710784 | 0.898301567 | 0.462590783 |

**Notes:** g3 represents the group treated by As2s2 at 2 μmoL/L; g1 represents the group without drug treatment.
